# Supplementary material for: Evaluation of the alignment of policies and practices for state-sponsored educational initiatives for sustainable health workforce solutions in selected Southern African countries: a protocol, multimethods study
Source: HighWire-hosted journal article supplement (doi:10.1136/bmjopen-2020-046379), 2021-04-01
Supplement: bmjopen-2020-046379supp001_data_supplement.pdf [file bmjopen-2020-046379supp001_data_supplement.pdf]

**Annexure A****Data Extraction: Policy Review****A. General Information and Eligibility**

|                                            |         |  |
|--------------------------------------------|---------|--|
| 1. Date form completed                     |         |  |
| 2. Name of person extracting data          |         |  |
| 3. Report title                            |         |  |
| 4. Publication type                        |         |  |
| 5. Type of document                        |         |  |
| 6. Publication reference                   |         |  |
| 7. Country of publication                  |         |  |
| 8. Province                                |         |  |
| 9. Policy description                      |         |  |
| 10. Decision                               | Include |  |
|                                            | Exclude |  |
| 11. Notes (include reasons for exclusion): |         |  |
|                                            |         |  |

\*No continuation if excluded.

**B. Context**

| Contextual variable                 | Description | Location in document |
|-------------------------------------|-------------|----------------------|
| 12. Date of publication             |             |                      |
| 13. Version number                  |             |                      |
| 14. Prior version Review Date       |             |                      |
| 15. Current version review Date     |             |                      |
| 16. Policy motivation and rationale |             |                      |
| 17. Policy history                  |             |                      |
| 18. Acts which informed policy      |             |                      |
| 19. Target beneficiaries            |             |                      |
| 20. Any other contextual issues     |             |                      |

### C. Policy Content

| <b>Factor</b>                                                        | <b>Description</b> | <b>Location in document</b> |
|----------------------------------------------------------------------|--------------------|-----------------------------|
| 21. Classification of beneficiaries                                  |                    |                             |
| 22. Beneficiary selection criteria                                   |                    |                             |
| 23. Policy objectives and/or purpose                                 |                    |                             |
| 24. Skills-mix of beneficiaries                                      |                    |                             |
| 25. Conditions of the funding                                        |                    |                             |
| 26. Duration of funding                                              |                    |                             |
| 27. Budgetary implications                                           |                    |                             |
| 28. Administration of scheme                                         |                    |                             |
| 29. Beneficiary responsibilities                                     |                    |                             |
| 30. Person/body responsible for admitting beneficiaries into scheme. |                    |                             |
| 31. Any other factors:                                               |                    |                             |

### D. Process Implementation

| <b>Process</b>                                           | <b>Description</b> | <b>Location in document</b> |
|----------------------------------------------------------|--------------------|-----------------------------|
| 32. Statutory conditions for validity of policy/contract |                    |                             |
| 33. Term of policy                                       |                    |                             |
| 34. Trigger for review of policy                         |                    |                             |
| 35. Trigger for evaluation of policy                     |                    |                             |
| 36. Skills or service needs determination process        |                    |                             |
| 37. Beneficiary selection process                        |                    |                             |
| 38. Contract renewal process                             |                    |                             |
| 39. Beneficiary monitoring processes                     |                    |                             |

|                                                                          |  |  |
|--------------------------------------------------------------------------|--|--|
| 40. Placement of beneficiaries into services after completion of studies |  |  |
| 41. Any other processes                                                  |  |  |

### E. Actors Involved

| Actors | Description | Location in document |
|--------|-------------|----------------------|
|        |             |                      |
|        |             |                      |
|        |             |                      |
|        |             |                      |

### F. Conclusion

| Remark | Description | Location in document |
|--------|-------------|----------------------|
|        |             |                      |
|        |             |                      |
|        |             |                      |
|        |             |                      |
